# Supplementary material for: An Approach to Track Instrument Calibration and Produce Consistent Products with the Version-8 Total Column Ozone Algorithm (V8TOZ)
Source: Copernicus journal article supplement (doi:10.5194/egusphere-2022-1500), 2023-02-27
Supplement: Supplementary file [file egusphere-2022-1500-AC1-supplement.pdf]

# Reply to Comments from Anonymous Referees

## Comments from Anonymous Referee #1

### Review

**Title:** An Approach to Track Instrument Calibration and Produce Consistent Products with the Version-8 Total Column Ozone Algorithm (V8TOZ)

**Authors:** Zhihua Zhang, Jianguo Niu, Lawrence E. Flynn, Eric Beach, and Trevor Beck

This paper describes an approach for radiometric adjustments of UV channels (between 310 – 380 nm) to achieve product consistency among viewing angles, demonstrate that the broad-band retrieval improves product quality over that of narrow-band retrieval. Papers that describe soft-calibration method are rarely published or submitted, but much needed. The broad-vs-narrow band finding is significant. Hence, I recommend publication of this paper, after addressing items listed below.

### General comments

This soft-calibration method improves the radiometric calibration of the OMPS instruments on SNPP and NOAA-20 satellites. However, this approach uses a soft-calibrated product (i.e., NASA's NMTO3-L2) as a reference. Therefore, its success depends on the success of a different soft-calibration method. Why develop a new one and not adopt the NASA method? How to ensure consistency over time from years to decades?

The NASA S-NPP OMPS total ozone product used soft calibration from ice radiances for its reflectivity channel calibration but it also used comparisons to the NOAA-19 SBUV/2 ozone amounts for its ozone channel calibration. We want to tie the OMPS ozone record to the SBUV/2 record. Since the NOAA and NASA products for S-NPP use the same measurements, it is straightforward to make the two agree. The convergence of the products (NASA's and NOAA's) lessens confusion from multiple versions. While it is important to have good calibration for all of the channels used in the V8TOz, small errors in the absolute calibration of the 331 nm reflectivity channel will be partially mitigated by the development of adjustments to the 318 nm channel to match "truth" ozone values using those biased reflectivity results. While the S-NPP products' calibration for the reflectivity channels thus trace their values back to the ice radiances, the cross-track dependence of the effective reflectivity and aerosol index over open ocean and vegetative land can be studied to check the performance of those adjustments. As discussed in the paper, the NOAA-20 cross-track reflectivity dependence was preserved from the laboratory calibration with an adjustment of the average level. The result, along with the pattern for minimum reflectivity over land, suggests that the ice radiance results may not be as good at higher view angles. Further, the long-term stability of the 1-percentile reflectivity over the Pacific box region is validated by the results in Figure 6.a taken with the instrument degradation shown in Figure 1. Good features of the Pacific box are that comparisons can be made all year round, that the solar zenith angles are low, and that the ozone is relatively stable and homogenous at the 10% level. This allows good cross-calibration of multiple sensors just using statistical matchups over multi-day coincident measurements.

### Specific comments

1. Line 55: 'homogeneous' is not the right word to describe SDR.

Agree.

*The S-NPP OMPS-NM was reprocessed with a consistent set of calibration tables to produce an SDR data set of uniform quality (Zou et al., 2020; Yan et al., 2022).*

2. Line 74: replace 'statistical' with algorithmic.

Agree

*The science basis and algorithmic procedures as well as error sources for the V8 algorithm have been well documented ...*

3. Line 74-75: 'The science basis and statistical procedures as well as error sources for the V8 algorithm have been well documented in the OMPS ATBD and other articles (Bhartia & Wellemeyer, 2002; McPeters et al., 1996).'

Many O<sub>3</sub> errors depend on instrument characteristics, therefore error analyses need to be performed for each instrument (or each slit function).

As the reviewer knows, the instrument radiative transfer look-up tables are designed to account for variations in the slit functions. Further the OMPS NM instrument designs and SDR processings are very similar, and we have used the broad channel approach to lessen certain error sources impacts.

4. Line 78: 'measurement departure', not clear in the context.

Changed:

*Thanks to the OMPS series, which provide similar instruments with the same scanning method and the same local Equator crossing times in the same orbital plane,*

5. Line 79: 'Researchers interested in error analysis and refined retrievals could take it as reference.' Explain.

Reworded.

*Researchers interested in detailed error analysis and refined retrievals can take it as starting point. For example, investigate the residual errors present from the OMPS NM polarization sensitivity.*

6. Line 88-90: 'The first assumption is that the BUV radiances at wavelengths greater than 310 nm are primarily a function of total ozone amount, with only a weak dependence on ozone profile shapes that can be accounted for by using a set of climatological profiles.'

This is NOT a good assumption for high (viewing and/or solar) zenith angles.

Agreed, caveat added.

*The first assumption is that the BUV radiances at wavelengths greater than 310 nm are primarily a function of total ozone amount, with only a weak dependence on ozone profile shapes that can be accounted for by using a set of climatological profiles. This is not a good assumption when the optical path length becomes large, e.g., at high solar zenith angles for large ozone loading.*

7. Line 90-92: 'The second assumption is that a relatively simple radiative transfer model that treats clouds, aerosols, and surfaces as Lambertian reflectors can account for most of the spectral dependence of BUV radiation.'

Lambertian representation of surface and atmospheric particles (i.e., clouds and/or aerosols) works because radiative transfer through this simplified model atmosphere-surface system closely simulate those in the actual atmosphere, especially in the stratosphere, where most O<sub>3</sub> absorption happens (see Huang and Yang, doi: 10.5194/amt- 15-5877-2022).

Agreed. We have added the reference.  
(See Huang and Yang, doi: 10.5194/amt-15-5877-2022.)

8. ‘Account for most of the spectral dependence of BUUV radiation’ is a manifestation of the success of this simplified model, not an assumption.

The algorithm developers were indeed smart guys, however we think that the use of “assumed” is acceptable here. Maybe “intuited”, “recognized” or “expected”, might be better.

We do not consider this paper to be a good place to have an expanded discussion of the errors present in the partial cloud model from differences in the computed cloud fraction versus the actual geometric cloud fraction, the cloud pressure in the model versus the true cloud top optical centroid, the cloud reflectivity versus the 80% model assumption, or the surface reflectivity wavelength dependence versus the actual dependence. An analysis of the performance shows that most are effects are second order, that is, they are usually products of two small errors.

9. Lines 129 – 130: ‘The slit functions provide key information for the spectra convolved values of the ozone absorption cross-sections’.

This statement seems to imply an incorrect construction or usage of look-up tables (LUTs). The correct LUT approach: 1) high-spectral resolution LUTs are constructed from radiative transfer calculations, 2) solar-weighted slit convolution of terms of Eq. 1 to create instrument (slit-function) specific LUTs. In these steps, slit-convolved cross-sections are not used.

Yes, this was too simplistic a statement. Revised  
*The slit functions provide key information for the spectra convolved values of the ozone absorption cross-sections as computed through the instrument table formulation using weighted averages of monochromatic radiance and irradiance components.*

10. Line 250: ‘should keep the same value for 35 cross-track positions.’ This description is not clear. Need revision.

Yes, this is not clear. We added description at line 250:  
*In this study, the adjustments for the other channels were set to produce constant measurement residuals with no cross-track variation. The mean residuals for the channels were set at the target retrievals from NASA OMPS S-NPP V8TOz using comparisons over the equatorial land areas with cloud-free pixels. There are no sun-glint bumps to influence the residuals along the 35 cross-tracks.*

11. Section 5, Comparison with other products

There is another EPIC total O<sub>3</sub> product, which provides high-accuracy O<sub>3</sub> retrievals (based on the publication, Huang and Yang, doi:10.5194/amt-15-5877-2022). It is expected to have a higher correlation and lower spread between this EPIC product and the OMPS products from SNPP and NOAA-20. Please include this product in the inter-comparisons.

Thanks for the information. We will use this product in future work.
